# Supplementary material for: Characterization of two myostatin genes in pufferfish Takifugu bimaculatus: sequence, genomic structure, and expression
Source: PeerJ. 2020 Aug 3;8:e9655. doi: 10.7717/peerj.9655 (PMC7409809; doi:10.7717/peerj.9655)
Supplement: Supplemental Information 1 [file peerj-08-9655-s001.xlsx]

## Sheet: Figure 6A
SAMPLE	target gene（mstn1）	reference gene（β-actin）
Eye	30.94	23.19
	31.09	24.12
	29.48	23.54
	31.23	25.12
Fins	38.81	26.45
	36.88	32.73
	37.85	23.74
	37.02	25.7
Liver	38.66	21.81
	35.35	25.16
	38.22	21.74
	37.2	24.51
Gallbladder	36.42	22.77
	38.7	23.26
	37.65	21.62
	38.34	24.83
Kidney	29.5	23.75
	30.26	23.02
	30.67	25.72
	30.4	25.9
Spleen	30.47	23.69
	31.81	22.58
	30.83	21.72
	31.43	22.8
Skin	35.91	25.6
	36.65	25.44
	37.54	24.01
	38.9	26.18
Heart	40	28.42
	40	23.76
	37.6	25.79
	40	27.74
Intestine	31.57	23.79
	33.32	20.89
	36.62	23.98
	36.39	25.16
Muscle	28.41	29.95
	29.73	31.19
	29.28	31.4
	29.68	32.1
Gill	31.65	27.43
	30.01	26.33
	31.16	25.47
	31.71	26.98
Brain	30.71	26.56
	31.37	26.1
	32.61	25.26
	31.83	26.72
