# Supplementary material for: Characterization of two myostatin genes in pufferfish Takifugu bimaculatus: sequence, genomic structure, and expression
Source: PeerJ. 2020 Aug 3;8:e9655. doi: 10.7717/peerj.9655 (PMC7409809; doi:10.7717/peerj.9655)
Supplement: Supplemental Information 3 [file peerj-08-9655-s003.xlsx]

## Sheet: Figure 7A 
sample	target gene（mstn1）	reference gene（β-actin）
two-cell stage	40	20.13
	40	21.06
	39.64	21.51
blastula stage	39.19	21.1
	40	21.08
	39.58	20.49
gastrula stage	34.97	19.16
	35.03	20.24
	34.51	20.14
neurula stage	34.69	20.24
	34.75	21.05
	34.62	20.58
somite appearance stage	35.66	20.16
	34.57	20.31
	34.67	21.21
eye lens formation stage	34.55	20.84
	34.56	19.69
	34.36	20.46
muscular activity stage	34.43	20.02
	34.45	18.78
	34.33	18.85
heart pulsation stage	32.91	20.2
	33.12	21.34
	33.21	20.77
eye pigment formation stage	34.95	21.29
	34.32	20.82
	34.76	20.11
hatching stage	33.57	21.86
	32.39	20.21
	33.83	20.88
